# Supplementary material for: Compulsive Hoarding: OCD Symptom, Distinct Clinical Syndrome, or Both?
Source: Atypon-hosted journal article supplement (doi:10.1176/appi.ajp.2008.07111730), 2008-05-16
Supplement: ajp_165_10_1289_01.pdf [file ajp_165_10_1289_01.pdf]

**Table 1****Between-Group Comparisons on the Clinician-Administered Measure of OCD Symptoms (DY-BOCS)**

|                                                | Hoarding Minus OCD (N=27) |     | OCD Plus Hoarding (N=25) |     | OCD Minus Hoarding (N=71) |     | F       | df | p      |
|------------------------------------------------|---------------------------|-----|--------------------------|-----|---------------------------|-----|---------|----|--------|
|                                                | Mean                      | SD  | Mean                     | SD  | Mean                      | SD  |         |    |        |
| DY-BOCS dimensions                             |                           |     |                          |     |                           |     |         |    |        |
| Hoarding                                       | 7.7 <sup>a</sup>          | 3.0 | 10.2 <sup>b</sup>        | 2.7 | 0.7 <sup>c</sup>          | 1.8 | 179.457 | 2  | 0.0000 |
| Contamination                                  | 0.5 <sup>a</sup>          | 1.2 | 5.1 <sup>b</sup>         | 3.9 | 5.0 <sup>b</sup>          | 5.2 | 9.869   | 2  | 0.0001 |
| Symmetry                                       | 1.8 <sup>a</sup>          | 2.2 | 8.2 <sup>b</sup>         | 2.9 | 5.0 <sup>c</sup>          | 4.5 | 16.808  | 2  | 0.0000 |
| Harm                                           | 0.5 <sup>a</sup>          | 1.3 | 5.3 <sup>b</sup>         | 4.4 | 6.4 <sup>b</sup>          | 4.7 | 17.413  | 2  | 0.0000 |
| Sexual/religious                               | 0.3 <sup>a</sup>          | 0.8 | 1.9 <sup>a,b</sup>       | 2.7 | 3.7 <sup>b</sup>          | 4.3 | 9.098   | 2  | 0.0002 |
| Miscellaneous                                  | 2.8 <sup>a</sup>          | 3.3 | 6.8 <sup>b</sup>         | 4.2 | 5.9 <sup>b</sup>          | 4.6 | 5.526   | 2  | 0.0051 |
| DY-BOCS impairment                             | 6.6 <sup>a</sup>          | 3.0 | 11.1 <sup>b</sup>        | 2.5 | 10.5 <sup>b</sup>         | 2.3 | 25.602  | 2  | 0.0000 |
| DY-BOCS severity                               | 7.1 <sup>a</sup>          | 3.0 | 11.4 <sup>b</sup>        | 2.4 | 10.7 <sup>b</sup>         | 2.4 | 21.358  | 2  | 0.0000 |
| DY-BOCS severity (minus hoarding) <sup>1</sup> | 3.5 <sup>a</sup>          | 2.3 | 9.6 <sup>b</sup>         | 2.1 | 10.7 <sup>b</sup>         | 2.4 | 86.603  | 2  | 0.0000 |
| DY-BOCS global score                           | 13.7 <sup>a</sup>         | 5.8 | 22.4 <sup>b</sup>        | 4.8 | 21.2 <sup>b</sup>         | 4.5 | 24.868  | 2  | 0.0000 |

Note: Means with different superscripts differ significantly at  $p < 0.05$ .

<sup>1</sup>This scale was modified from the original DY-BOCS severity scale and rated by the clinician, excluding hoarding symptoms.

**Table 2****Between-Group Comparisons on Self-Administered Measures of Hoarding and OCD Symptoms**

|                               | Hoarding Minus OCD<br>(N=27) |      | OCD Plus Hoarding<br>(N=25) |      | OCD Minus Hoarding<br>(N=71) |      | Anxiety Disorder<br>Comparison (N=19)* |      | Healthy Comparison<br>(N=21) |     |
|-------------------------------|------------------------------|------|-----------------------------|------|------------------------------|------|----------------------------------------|------|------------------------------|-----|
|                               | Mean                         | SD   | Mean                        | SD   | Mean                         | SD   | Mean                                   | SD   | Mean                         | SD  |
| Savings Inventory total score | 52.7 <sup>a</sup>            | 16.6 | 61.2 <sup>a</sup>           | 13.2 | 16.5 <sup>b</sup>            | 12.4 | 17.1 <sup>b</sup>                      | 11.1 | 13.0 <sup>b</sup>            | 7.8 |
| Clutter                       | 25.1 <sup>a</sup>            | 8.5  | 27.3 <sup>a</sup>           | 7.4  | 4.7 <sup>b</sup>             | 5.4  | 4.6 <sup>b</sup>                       | 5.0  | 3.4 <sup>b</sup>             | 3.2 |
| Difficulty Discarding         | 19.6 <sup>a</sup>            | 2.8  | 20.5 <sup>a</sup>           | 3.5  | 7.0 <sup>b</sup>             | 5.8  | 6.9 <sup>b</sup>                       | 5.1  | 5.0 <sup>b</sup>             | 4.6 |
| Acquisition                   | 10.4 <sup>a</sup>            | 4.6  | 11.6 <sup>a</sup>           | 4.3  | 4.5 <sup>b</sup>             | 3.8  | 4.7 <sup>b</sup>                       | 2.9  | 2.8 <sup>b</sup>             | 2.3 |
| OCI-R total score             | 17.5 <sup>a</sup>            | 6.3  | 36.3 <sup>b</sup>           | 13.2 | 27.8 <sup>b</sup>            | 12.9 | 13.9 <sup>a</sup>                      | 9.4  | 4.5 <sup>c</sup>             | 5.6 |
| Hoarding                      | 9.3 <sup>a</sup>             | 1.6  | 9.6 <sup>a</sup>            | 2.3  | 2.4 <sup>c</sup>             | 3.0  | 2.3 <sup>c</sup>                       | 2.4  | 1.0 <sup>c</sup>             | 1.4 |
| Washing                       | 0.3 <sup>a</sup>             | 0.6  | 4.0 <sup>b</sup>            | 3.1  | 4.9 <sup>b</sup>             | 4.3  | 1.1 <sup>a</sup>                       | 1.5  | 0.1 <sup>a</sup>             | 0.5 |
| Checking                      | 1.7 <sup>a</sup>             | 1.7  | 6.8 <sup>b</sup>            | 3.8  | 6.5 <sup>b</sup>             | 4.4  | 1.7 <sup>a</sup>                       | 2.3  | 0.9 <sup>a</sup>             | 1.7 |
| Neutralizing                  | 0.9 <sup>a</sup>             | 1.3  | 4.0 <sup>b</sup>            | 4.0  | 4.0 <sup>b</sup>             | 4.3  | 0.3 <sup>a</sup>                       | 0.8  | 0.2 <sup>a</sup>             | 0.6 |
| Obsessing                     | 2.7 <sup>a</sup>             | 2.9  | 6.6 <sup>b</sup>            | 4.7  | 7.5 <sup>b</sup>             | 3.5  | 4.6 <sup>a</sup>                       | 3.4  | 0.6 <sup>a</sup>             | 1.2 |
| Ordering                      | 2.6 <sup>a</sup>             | 2.0  | 6.1 <sup>b,c</sup>          | 3.4  | 5.3 <sup>b,c</sup>           | 3.7  | 3.3 <sup>a,c</sup>                     | 2.9  | 1.7 <sup>a</sup>             | 2.5 |

Note: Means with different superscripts differ significantly at  $p < 0.05$ .

Abbreviations: OCI-R (Obsessive-compulsive Inventory-Revised).

\*Social phobia (N=12), panic disorder with or without agoraphobia (N=8), generalized anxiety disorder (N=4), and posttraumatic stress disorder (N=1).

### Table 3

#### Between-Group Comparisons on Self-Administered Measures of Disability/Adjustment and Depression

|                            | Hoarding Minus OCD (N=27) |      | OCD Plus Hoarding (N=25) |      | OCD Minus Hoarding (N=71) |      | Anxiety Disorder Comparison (N=19)* |     | Healthy Comparison (N=21) |     |
|----------------------------|---------------------------|------|--------------------------|------|---------------------------|------|-------------------------------------|-----|---------------------------|-----|
| WSAS total score           | 18.9 <sup>a</sup>         | 9.8  | 23.0 <sup>a</sup>        | 8.2  | 19.3 <sup>a</sup>         | 9.6  | 16.9 <sup>a</sup>                   | 8.4 | 2.7 <sup>b</sup>          | 5.6 |
| Work                       | 3.8 <sup>a</sup>          | 2.0  | 4.9 <sup>a</sup>         | 2.6  | 4.5 <sup>a</sup>          | 2.3  | 4.7 <sup>a</sup>                    | 2.5 | 0.5 <sup>b</sup>          | 1.3 |
| Home Management            | 5.1 <sup>a</sup>          | 2.5  | 5.6 <sup>a</sup>         | 1.8  | 3.7 <sup>a</sup>          | 2.2  | 2.3 <sup>b</sup>                    | 2.4 | 0.6 <sup>b</sup>          | 1.5 |
| Social Leisure Activities  | 3.4 <sup>a</sup>          | 2.9  | 3.9 <sup>a</sup>         | 1.9  | 4.3 <sup>a</sup>          | 2.1  | 5.0 <sup>a</sup>                    | 2.7 | 0.5 <sup>b</sup>          | 1.0 |
| Private Leisure Activities | 3.1 <sup>a,b</sup>        | 2.4  | 4.1 <sup>a</sup>         | 1.9  | 3.3 <sup>a,b</sup>        | 2.0  | 1.9 <sup>b,c</sup>                  | 1.9 | 0.5 <sup>c</sup>          | 1.8 |
| Family and relationships   | 3.2 <sup>a</sup>          | 2.5  | 4.6 <sup>a</sup>         | 2.5  | 3.6 <sup>a</sup>          | 2.4  | 3.1 <sup>a</sup>                    | 2.4 | 0.5 <sup>b</sup>          | 1.5 |
| Beck Depression Inventory  | 17.5 <sup>a</sup>         | 11.1 | 18.9 <sup>a</sup>        | 11.2 | 15.0 <sup>a</sup>         | 12.8 | 18.6 <sup>a</sup>                   | 9.6 | 4.6 <sup>b</sup>          | 5.5 |

Note: Means with different superscripts differ significantly at  $p < 0.05$ .

Abbreviations: WSAS (Work and social adjustment scale).

\*Social phobia (N=12), panic disorder with or without agoraphobia (N=8), generalized anxiety disorder (N=4), and posttraumatic stress disorder (N=1).
